# Supplementary material
Source: Springer Nature journal article supplement (https://www.springermedizin.de/resource/supplementary/12879_2012_2010_MOESM1_ESM.pdf/9443522)
Supplement: MOESM1 [file 9443522]

3742 consecutive TB suspect episodes (SE) with at least 1 smear and 1 culture result available

30 SE with NTM culture results (0.8%)  
18 SE with lost viability culture results (0.5%)  
578 SE with contaminated culture results (15.4%)

3116 SE

579 SE that have  $\geq 3$  smears and  $\geq 3$  cultures done

2537 SE for analysis  
(67.8% of 3742)
